# Supplementary material for: The apical scaffold big bang binds to spectrins and regulates the growth of Drosophila melanogaster wing discs
Source: PubMed Central journal article supplement — J Cell Biol. 2018 Mar 5;217(3):1047–62. doi: 10.1083/jcb.201705107 (PMC5839784; doi:10.1083/jcb.201705107), 2018-03-05
Supplement: JCB_201705107_sm.pdf [file JCB_201705107_sm.pdf]

**A** *bbg* locus after RMCE insertion of *LoxP* sites and *White* genes in the MI04312 and MI03323 elements here shown in trans

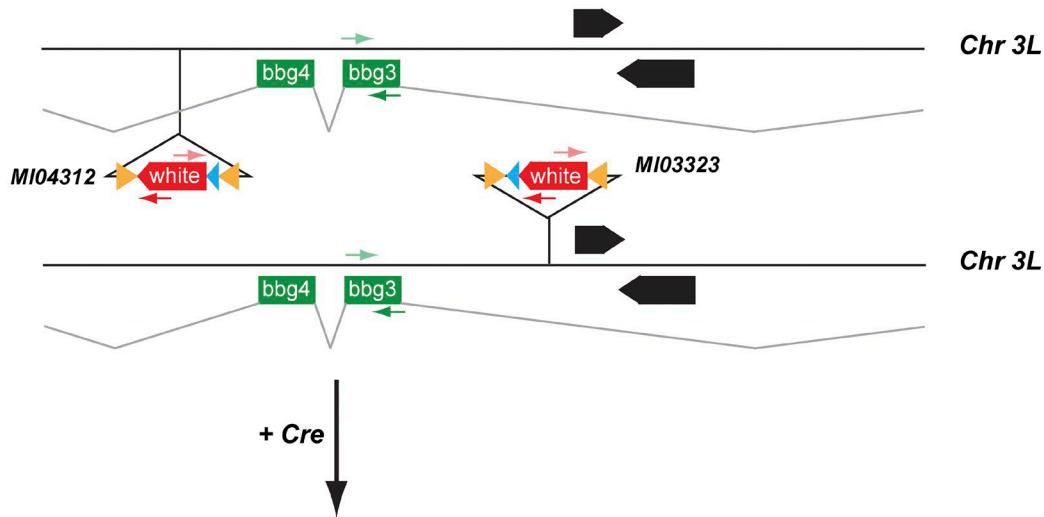

**B** *bbg* locus after Cre-mediated excision of the *LoxP* sites

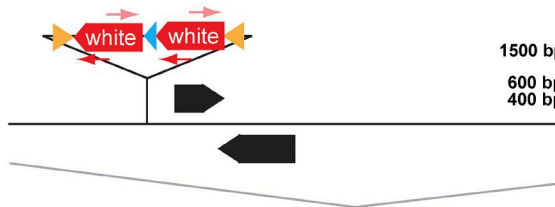

**C** PCR validation of the deletion for the *bbg*<sup>10</sup> and *bbg*<sup>34</sup> alleles

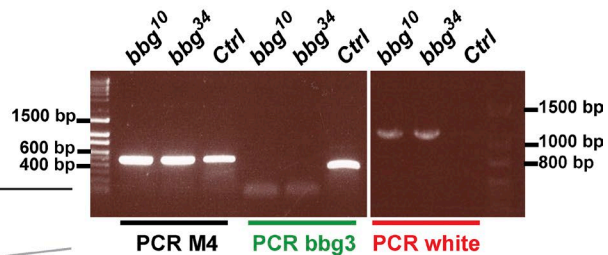

Figure S1. **Generation of new *bbg* alleles by recombinase-mediated cassette exchange.** (A) Schematic representation of the *bbg* locus focusing on the third and fourth exons (*bbg3* and *bbg4* in green). The two MiMIC insertions flanking these exons have been engineered by recombination-mediated cassette exchange (RMCE) to introduce a *w*<sup>+</sup> marker and a *LoxP* site (in blue). Green and red arrows represent specific primer sets used for mapping. (B) *bbg* locus after a boost of Cre recombinase. (C) PCR validation of these events on adult fly homozygous genomic DNA. PCR M4 is a PCR with primers for the *E(spl)-m4* gene and was unaffected in this procedure. This approach led to specific deletions (shown in this image are the *bbg*<sup>10</sup> and *bbg*<sup>34</sup> alleles) at high frequency.

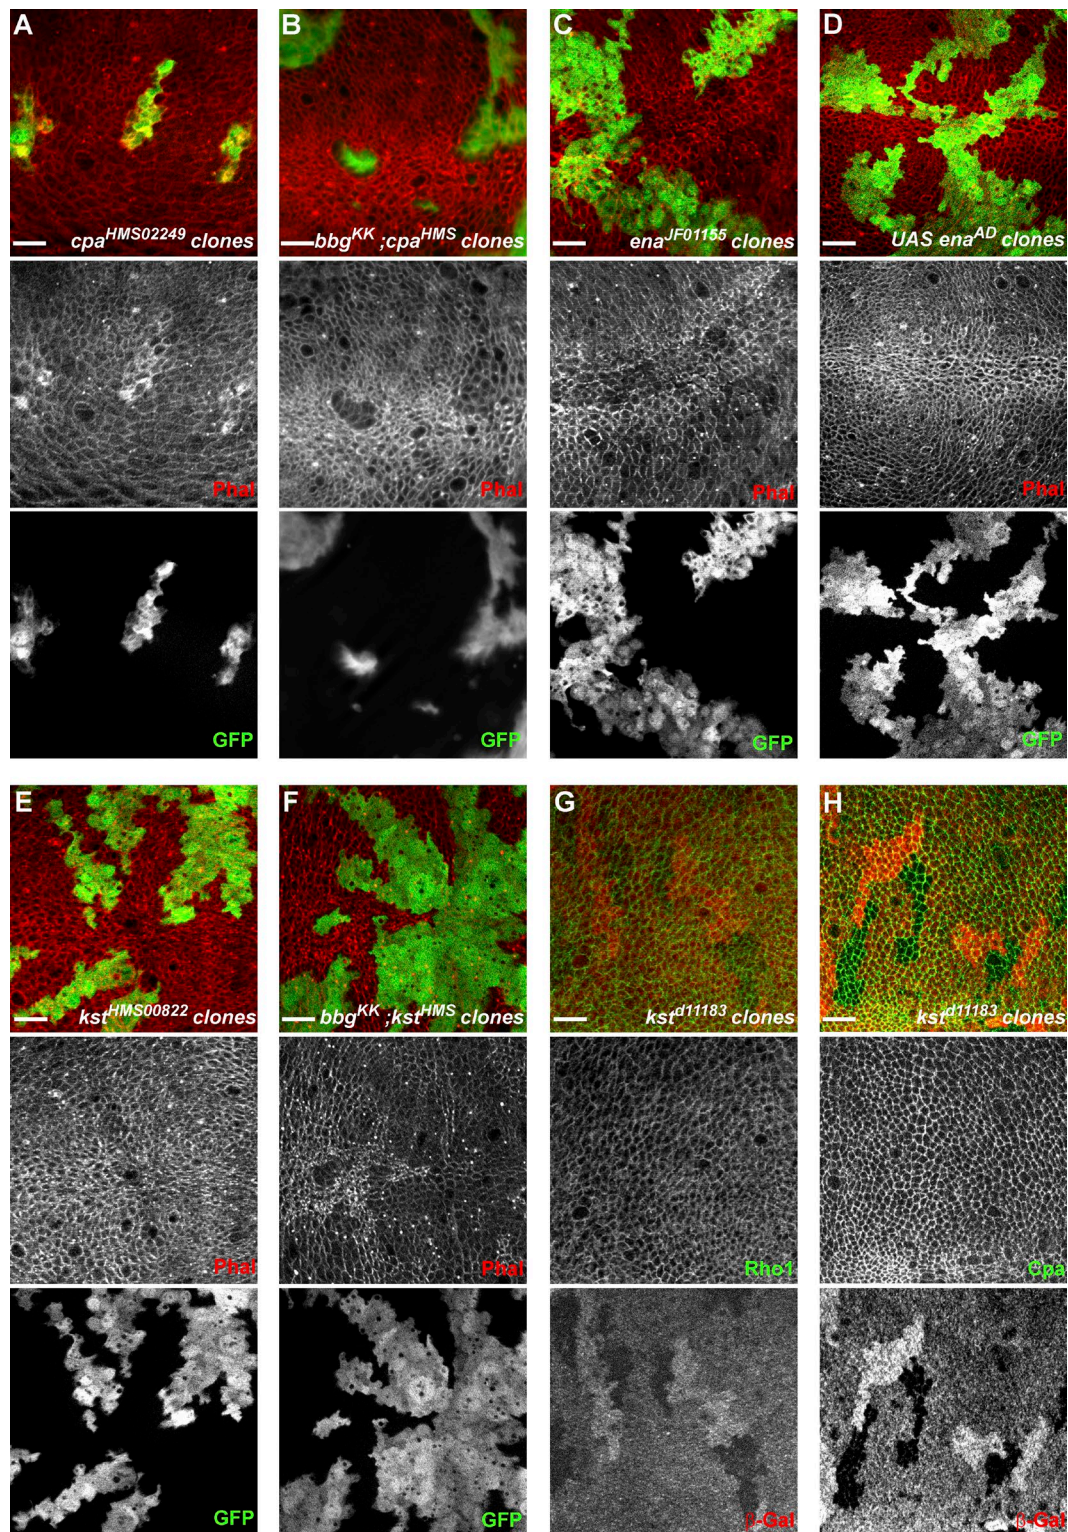

Figure S2. **Cortical F-actin cytoskeleton in *bbg* or *kst* mutants.** (A–F) Overexpression clones marked by GFP (green) leading to depletion of *cpa* (A), double depletion of *cpa* and *bbg* (B), depletion of *ena* (C), overexpression of *ena* (D), depletion of *kst* (E), or double depletion of *bbg* and *kst* (F), and showing the organization of the cortical apical F-actin (red). No changes in F-actin could be observed after *ena* level modulation or *kst* depletion. A strong decrease of apical F-actin was seen only in *bbg*-depleted cells (B and F), imposing even on the *cpa* depletion-induced F-actin enrichment (A). (G and H) *kst*<sup>d11183</sup> mutant clones in the larval wing disc marked by the absence of  $\beta$ -galactosidase (red) and marked for the actin regulators Rho1 (G, green) and Cpa (H, green). No significant difference was observed between WT and *kst* mutant cells. Bars, 10  $\mu$ m.



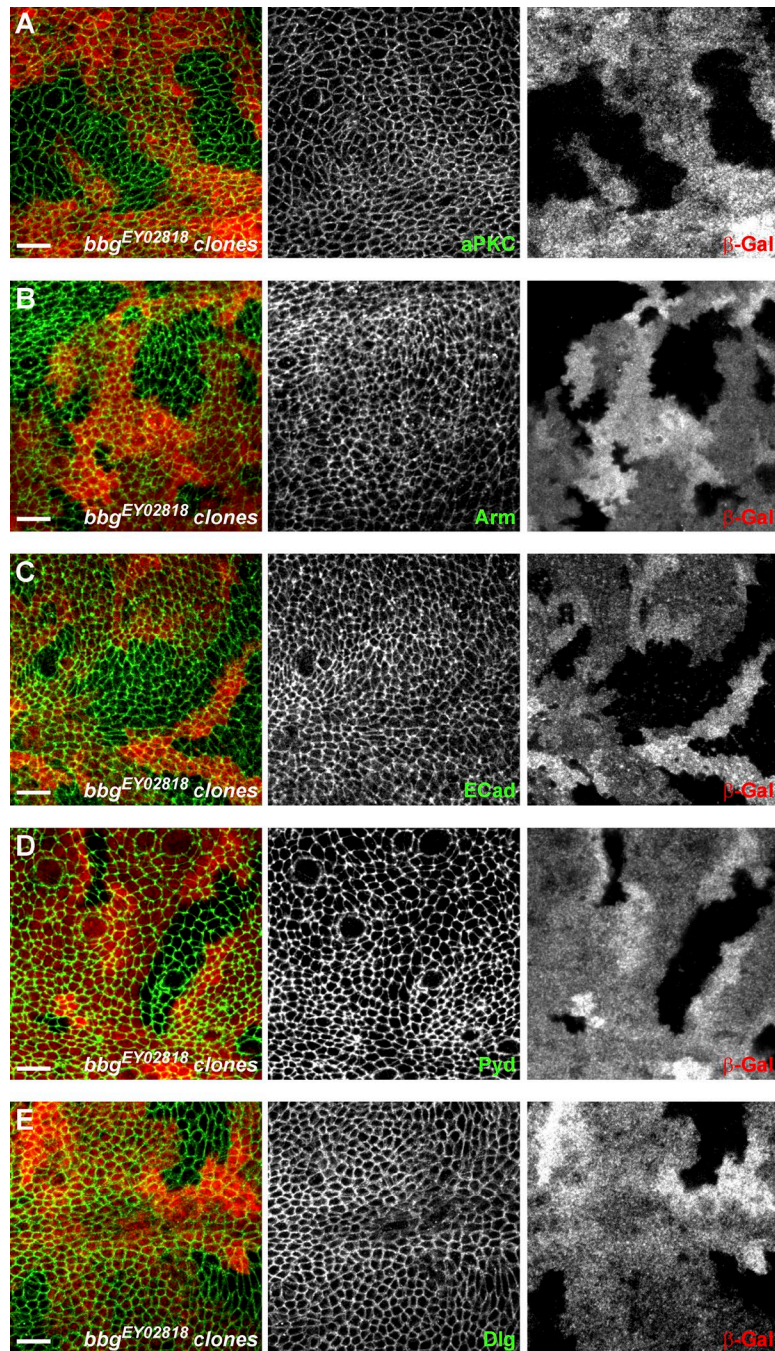

Figure S3. **Epithelial apical-basal polarity is unaffected in *bbg* mutants.** (A-E) *bbg*<sup>EY02818</sup> mutant clones in the larval wing disc marked by the absence of  $\beta$ -Galactosidase (red) and marked for the apical-basal markers aPKC (A, green), armadillo (B, green), E-Cad (C, green), polychaetoid (D, green), and Dlg (E, green). No significant difference was observed between WT and *bbg* mutant cells. Bars, 10  $\mu$ m.

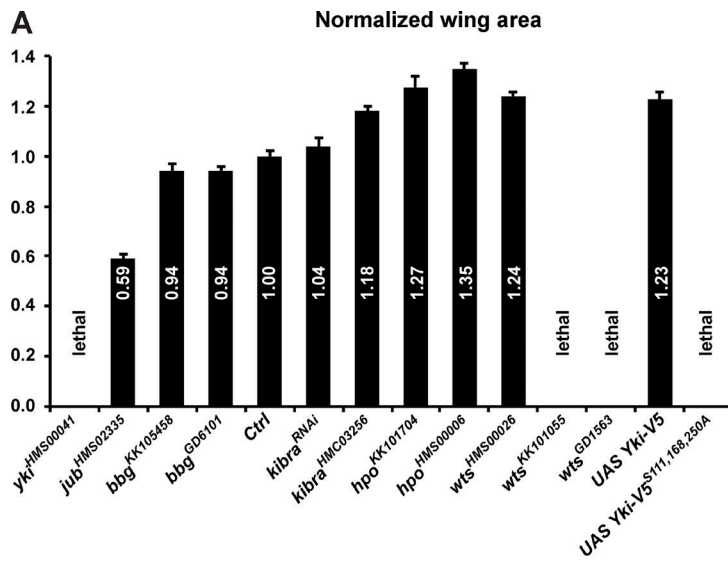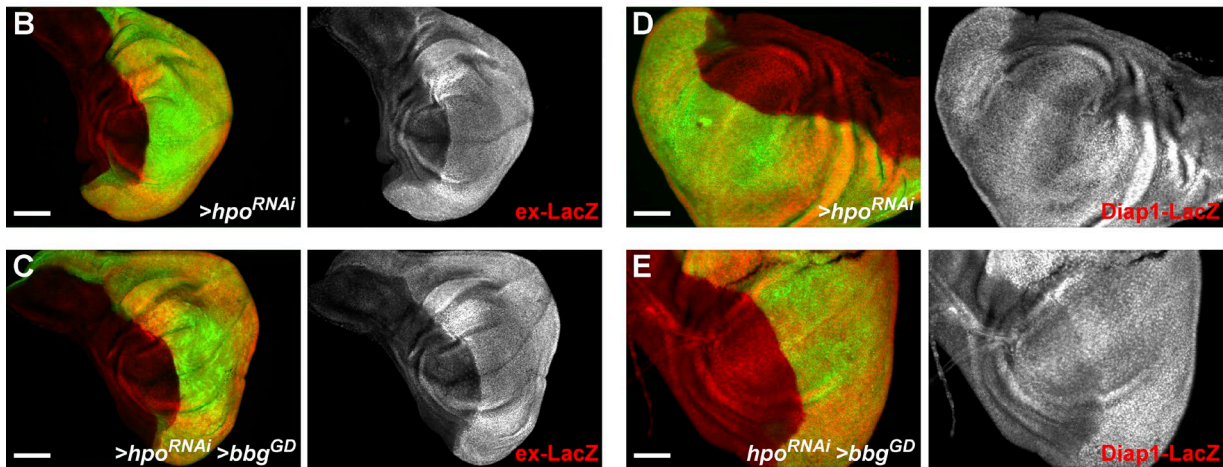

Figure S4. **Bbg and the Hippo pathway.** (A) Adult female *Drosophila* wing size after *nubG4*-driven RNAi knockdown at 25°C of the indicated genotypes. The wing area for each genotype is expressed as a ratio compared with the mean wing area of the *nubG4*>UAS GFP controls (*Ctrl*). SD is shown;  $n = 17$ –31 independent female wings. Some combinations did not produce any viable adults and are labeled “lethal.” (B–E) Pouch region of third instar larva wing imaginal discs. Effect of *hh-Gal4*-driven RNAi knockdown in the posterior compartment marked by GFP (green) on the expression of the Yki activity reporters *ex-LacZ* (B and C, red) and *Diap1-LacZ* (D and E, red). The up-regulations of *ex-LacZ* and *Diap1-LacZ* caused by *hpo* knockdown (B and D) were not affected by the further knockdown of *bbg* (C and E). Quantifications are shown in Fig. 5. Bars: (B and C) 100  $\mu$ m; (D and E) 50  $\mu$ m.
